# Supplementary material for: CD34+THY1+ synovial fibroblast subset in arthritic joints has high osteoblastic and chondrogenic potentials in vitro
Source: Springer Nature journal article supplement (doi:10.1186/s13075-022-02736-7), 2022-02-15

# Supplementary Figure 6

## A

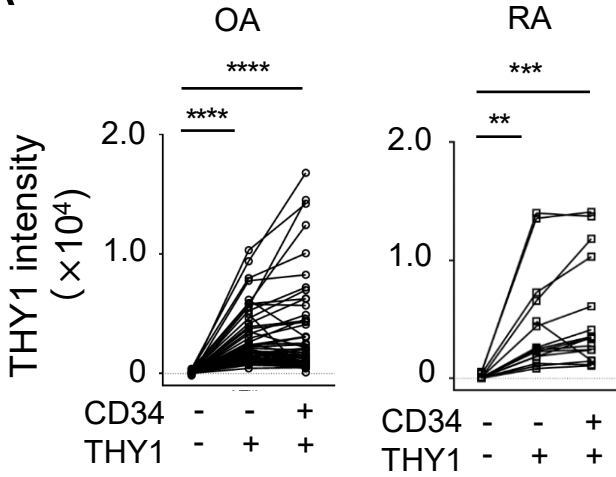

## B

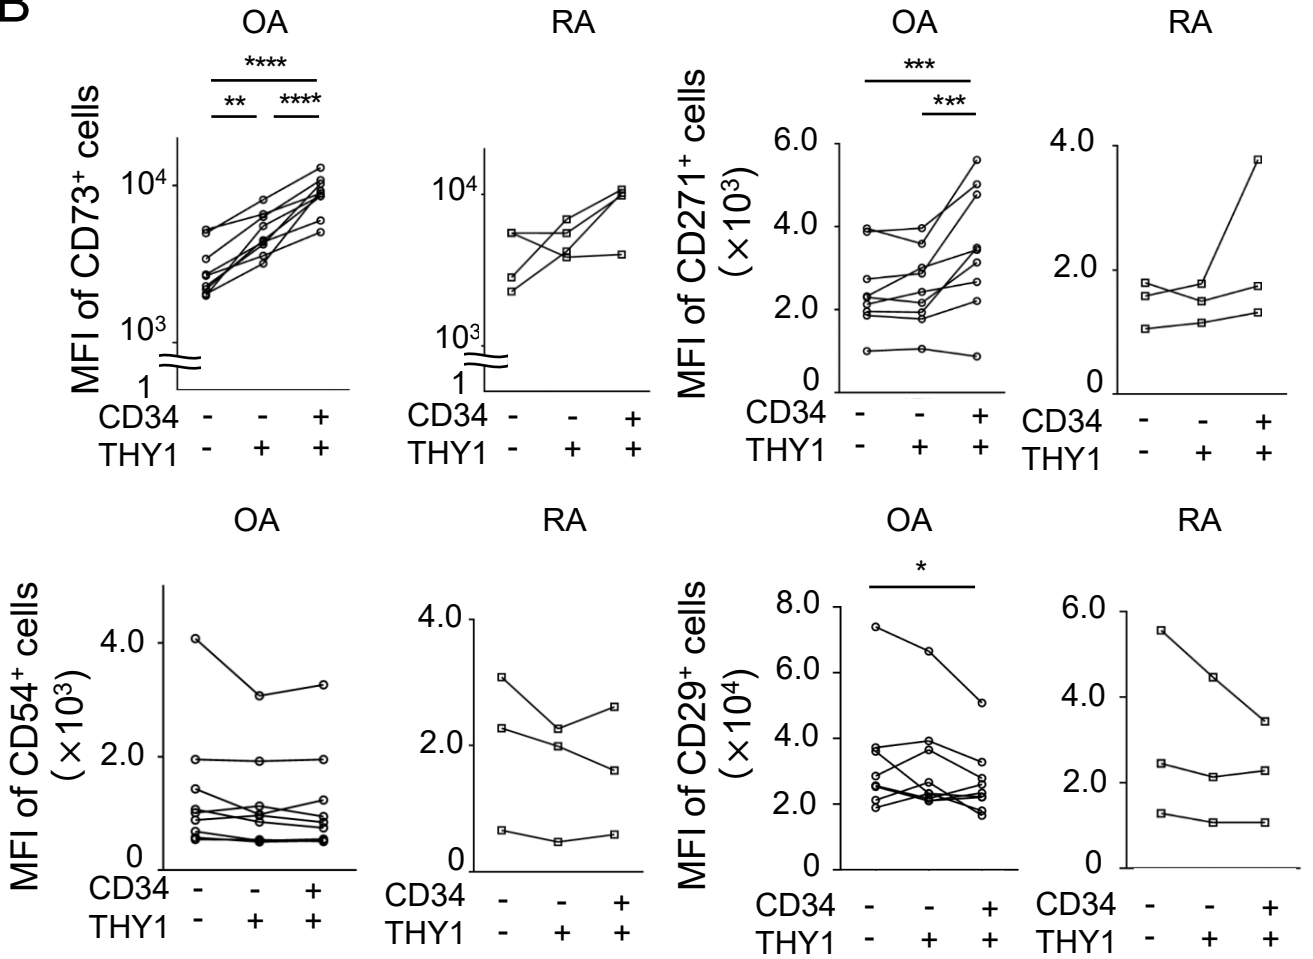

Supplement: MOESM6 [file 20135124]
